# Supplementary material for: Case Report: Treatment of a Comorbid Attention Deficit Hyperactivity Disorder and Obsessive–Compulsive Disorder With Psychostimulants
Source: Frontiers journal article supplement (doi:10.3389/fpsyt.2021.649833), 2021-05-12
Supplement: Data_Sheet_1.pdf [file Data_Sheet_1.pdf]

## CARE Checklist of information to include when writing a case report

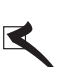

| Topic                                             | Item | Checklist item description                                                                                       | Reported on Line                                                    |
|---------------------------------------------------|------|------------------------------------------------------------------------------------------------------------------|---------------------------------------------------------------------|
| Title<br>Key Words<br>Abstract<br>(no references) | 1    | The diagnosis or intervention of primary focus followed by the words "case report" . . . . .                     | P 1                                                                 |
|                                                   | 2    | 2 to 5 key words that identify diagnoses or interventions in this case report, including "case report" . . . . . | L 14-15                                                             |
|                                                   | 3a   | Introduction: What is unique about this case and what does it add to the scientific literature? . . . . .        | L 18-25                                                             |
|                                                   | 3b   | Main symptoms and/or important clinical findings . . . . .                                                       | L 27-30                                                             |
| Introduction                                      | 3c   | The main diagnoses, therapeutic interventions, and outcomes . . . . .                                            | L 30-38                                                             |
|                                                   | 3d   | Conclusion—What is the main "take-away" lesson(s) from this case? . . . . .                                      | L 39-45                                                             |
|                                                   | 4    | One or two paragraphs summarizing why this case is unique ( <b>may include references</b> ) . . . . .            | L 46-81                                                             |
|                                                   | 5a   | De-identified patient specific information. . . . .                                                              | L 84                                                                |
| Patient Information                               | 5b   | Primary concerns and symptoms of the patient. . . . .                                                            | L 87-116, T1                                                        |
|                                                   | 5c   | Medical, family, and psycho-social history including relevant genetic information . . . . .                      | L 132-154                                                           |
|                                                   | 5d   | Relevant past interventions with outcomes . . . . .                                                              | L 132-150                                                           |
|                                                   | 6    | Describe significant physical examination (PE) and important clinical findings. . . . .                          | L 154-169, 172-181                                                  |
| Clinical Findings                                 | 7    | Historical and current information from this episode of care organized as a timeline . . . . .                   | L 244, F1                                                           |
|                                                   | 8a   | Diagnostic testing (such as PE, laboratory testing, imaging, surveys). . . . .                                   | L 154-169, 172-181                                                  |
|                                                   | 8b   | Diagnostic challenges (such as access to testing, financial, or cultural) . . . . .                              | -                                                                   |
|                                                   | 8c   | Diagnosis (including other diagnoses considered) . . . . .                                                       | L 104, 168-169                                                      |
| Diagnostic Assessment                             | 8d   | Prognosis (such as staging in oncology) where applicable . . . . .                                               | -                                                                   |
|                                                   | 9a   | Types of therapeutic intervention (such as pharmacologic, surgical, preventive, self-care) . . . . .             | L 182-187                                                           |
|                                                   | 9b   | Administration of therapeutic intervention (such as dosage, strength, duration) . . . . .                        | L 182-187                                                           |
|                                                   | 9c   | Changes in therapeutic intervention (with rationale) . . . . .                                                   | L 202-205, 213-219                                                  |
| Therapeutic Intervention                          | 10a  | Clinician and patient-assessed outcomes (if available) . . . . .                                                 | L 192-198, 222-239, T2                                              |
|                                                   | 10b  | Important follow-up diagnostic and other test results . . . . .                                                  | L 233-239                                                           |
|                                                   | 10c  | Intervention adherence and tolerability (How was this assessed?) . . . . .                                       | -                                                                   |
|                                                   | 10d  | Adverse and unanticipated events . . . . .                                                                       | -                                                                   |
| Follow-up and Outcomes                            | 11a  | A scientific discussion of the strengths AND limitations associated with this case report . . . . .              | L 289-301                                                           |
|                                                   | 11b  | Discussion of the relevant medical literature <b>with references</b> . . . . .                                   | L 282-289                                                           |
|                                                   | 11c  | The scientific rationale for any conclusions (including assessment of possible causes) . . . . .                 | L 263-281                                                           |
|                                                   | 11d  | The primary "take-away" lessons of this case report (without references) in a one paragraph conclusion . . . . . | L 302-311                                                           |
| Patient Perspective                               | 12   | The patient should share their perspective in one to two paragraphs on the treatment(s) they received . . . . .  | -                                                                   |
|                                                   | 13   | Did the patient give informed consent? Please provide if requested . . . . .                                     | Yes <input checked="" type="checkbox"/> No <input type="checkbox"/> |
| Informed Consent                                  |      |                                                                                                                  |                                                                     |
